# Supplementary material for: Comparison of Seroconversion in Children and Adults With Mild COVID-19
Source: PubMed Central journal article supplement (PMC8908077; doi:10.1001/jamanetworkopen.2022.1313), 2022-03-09
Supplement: jamanetwopen-e221313-s001.pdf [file jamanetwopen-e221313-s001.pdf]

## Supplementary Online Content

Toh ZQ, Anderson J, Mazarakis N, et al. Comparison of seroconversion in children and adults with mild COVID-19. *JAMA Netw Open*. 2022;5(3):e221313. doi:10.1001/jamanetworkopen.2022.1313

- eTable 1.** Antibody Cocktail to Identify Adaptive Immune Cell Populations
- eTable 2.** Antibody Cocktail to Identify Innate Immune Cell Populations
- eTable 3.** Concordance of 3 Serological Assays for All Samples at Convalescent Period From the Whole Household Cohort Study
- eFigure 1.** Gating Strategy to Identify T-cell Subsets
- eFigure 2.** Gating Strategy to Identify B-cell/TFH Subsets
- eFigure 3.** Gating Strategy for Innate Cell Populations
- eFigure 4.** Correlation Analysis of 3 Serological Assays
- eFigure 5.** Correlation Analysis of 3 Serological Assays Against SARS-CoV-2 Microneutralization Assay
- eFigure 6.** SARS-CoV-2 IgG Levels Over Time in Children and Adults Using an In-house ELISA
- eFigure 7.** Duration of Post-PCR Diagnosis and Viral Clearance, Sex, and Age Associated With SARS-CoV-2 Antibody Responses
- eFigure 8.** Symptoms and Correlation Analysis Associated With SARS-CoV-2 Antibody Responses
- eFigure 9.** Humoral Immune Cells Profile During Convalescence Period in Children and Adults Following SARS-CoV-2 Infection
- eFigure 10.** Cellular Immune Profile (T Cells) During Convalescence Period in Children and Adults Following SARS-CoV-2 Infection
- eFigure 11.** Innate Cell Profiles During Acute Phase for Children and Adults Following SARS-CoV-2 Infection

This supplementary material has been provided by the authors to give readers additional information about their work.

**eTable 1. Antibody Cocktail to Identify Adaptive Immune Cell Populations**

| Antibody Cocktail 1 | Supplier                          | Antibody Cocktail 2 | Supplier                          |
|---------------------|-----------------------------------|---------------------|-----------------------------------|
| CD3-BUV395          | BD Bioscience, San Diego, CA, USA | CD3-Percp/Cy5.5     | BD Bioscience, San Diego, CA, USA |
| CD4-BV421           | BD Bioscience, San Diego, CA, USA | CD4-BV510           | BioLegend, San Diego, USA         |
| CD8-BUV805          | BD Bioscience, San Diego, CA, USA | CXCR5-APCR700       | BD Bioscience, San Diego, CA, USA |
| CD45RA-Percp/Cy5.5  | BD Bioscience, San Diego, CA, USA | PD-1-PEcy7          | BD Bioscience, San Diego, CA, USA |
| CCR7-BV785          | BioLegend, San Diego, USA         | CD19-BV785          | BioLegend, San Diego, USA         |
| CD69-BV650          | BD Bioscience, San Diego, CA, USA | CD20-BV421          | BioLegend, San Diego, USA         |
| HLA-APC-H7          | BD Bioscience, San Diego, CA, USA | CD27-BUV737         | BD Bioscience, San Diego, CA, USA |
| Zombie NIR          | BioLegend, San Diego, USA         | CD19-BV785          | BioLegend, San Diego, USA         |
|                     |                                   | CD38-BUV496         | BD Bioscience, San Diego, CA, USA |
|                     |                                   | CD24-BV711          | BioLegend, San Diego, USA         |
|                     |                                   | IgG-BV605           | BD Bioscience, San Diego, CA, USA |
|                     |                                   | IgM-FITC            | BioLegend, San Diego, USA         |
|                     |                                   | Zombie NIR          | BioLegend, San Diego, USA         |

**eTable 2. Antibody Cocktail to Identify Innate Immune Cell Populations**

| <b>Surface Marker</b> | <b>Fluorophore</b> | <b>Clone</b> | <b>Final Dilution</b> |
|-----------------------|--------------------|--------------|-----------------------|
| CD14                  | BV786              | M5E2         | 1:50                  |
| CD45                  | BV711              | HI30         | 1:100                 |
| CD56                  | BUV737             | NCAM16.2     | 1:100                 |
| CD11c                 | PE-Cy7             | B-ly6        | 1:100                 |
| CD3                   | BB515              | UCHTI        | 1:100                 |
| CD15                  | PE-CF594           | W6D3         | 1:200                 |
| HLA-DR                | V500               | G46-6        | 1:200                 |
| CD19                  | BV605              | SJ25C1       | 1:200                 |
| CD16                  | BUV395             | 3G8          | 1:400                 |
| Live/dead             | N-IR               |              |                       |

**eTable 3. Concordance of 3 Serological Assays for All Samples at Convalescent Period From the Whole Household Cohort Study**

|                       |          | Diasorin |          |               |          | Diasorin |          |                       |          | Wantai   |          |
|-----------------------|----------|----------|----------|---------------|----------|----------|----------|-----------------------|----------|----------|----------|
|                       |          | Positive | Negative |               |          | Positive | Negative |                       |          | Positive | Negative |
| <b>In-house ELISA</b> | Positive | 56       | 10       | <b>Wantai</b> | Positive | 54       | 10       | <b>In-house ELISA</b> | Positive | 61       | 3        |
|                       | Negative | 3        | 164      |               | Negative | 3        | 162      |                       | Negative | 3        | 162      |
|                       | Total    |          | 233      |               | Total    |          | 229      |                       | Total    |          | 229      |
| Agreement             |          | 0.94     |          |               |          | 0.94     |          |                       |          | 0.97     |          |

**eFigure 1. Gating Strategy to Identify T-cell Subsets** From live single cells, T-cells were identified by positive CD3 expression. CD4+ and CD8+ T-cells were identified from the CD3+ population. CD4+ T-cells and CD8+ T-cells were characterised into naïve (N), effector (E), central memory (CM) and effector memory (EM) based off CCR7 and CD45RA expression. These were CCR7+CD45RA+, CCR7-CD45RA+, CCR7+CD45RA- and CCR7-CD45RA- respectively. CD69+ and HLA+ expression was also characterised on CD4+ and CD8+ T-cells.

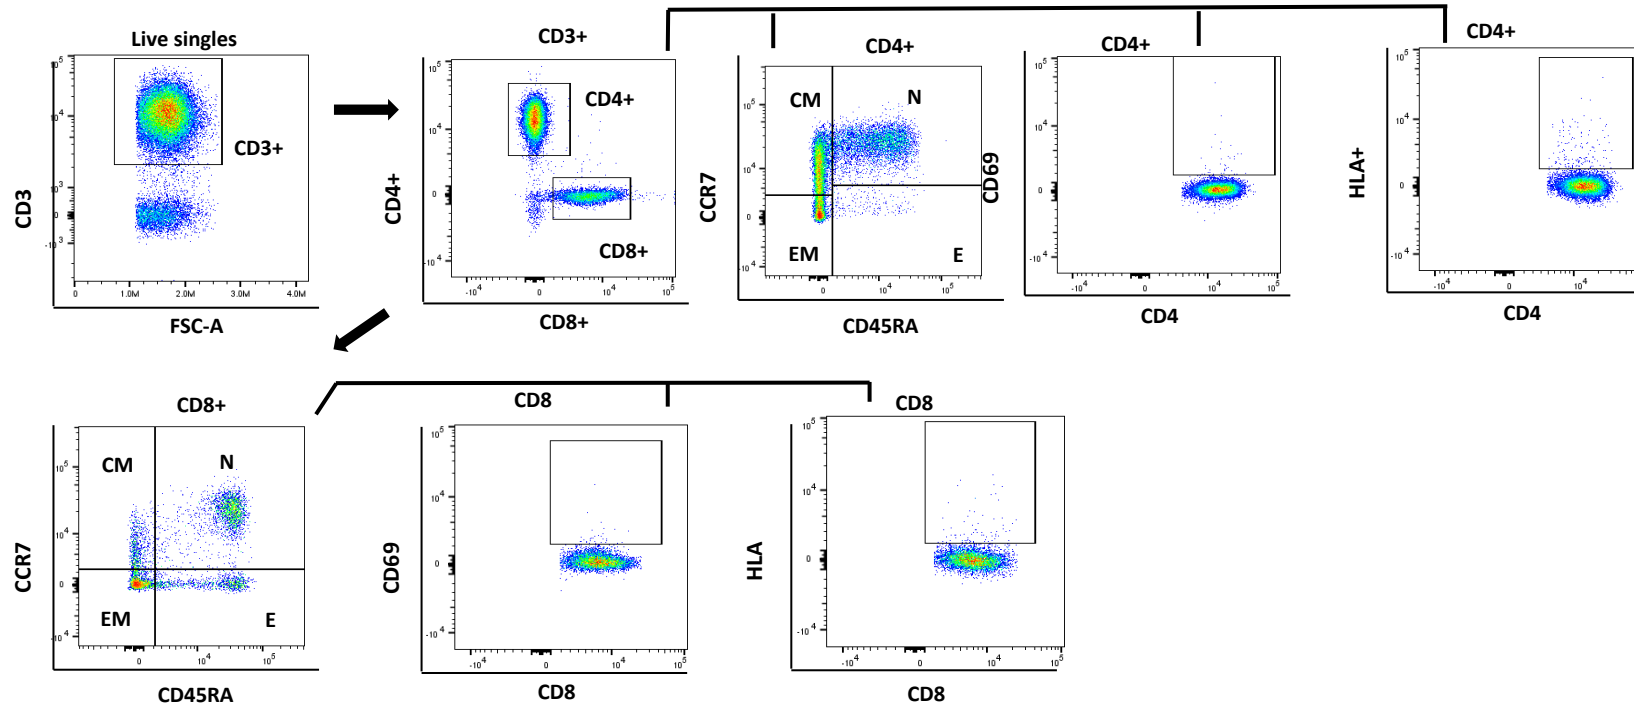

**eFigure 2. Gating Strategy to Identify B-cell/T<sub>FH</sub> Subsets** From live single cells, T-cells were identified as CD3+CD19- and B-cells were identified as the CD3-CD19+ population. From the CD3+ population, T<sub>FH</sub> was characterised as CD4+CXCR5+PD-1+ expressing T-cells. From the B-cell population, memory was identified as CD27+, transitional B-cells as CD24+CD38+ and plasmablasts as CD27+CD20-CD38+. IgM and IgG expression were also characterised on B-cell populations.

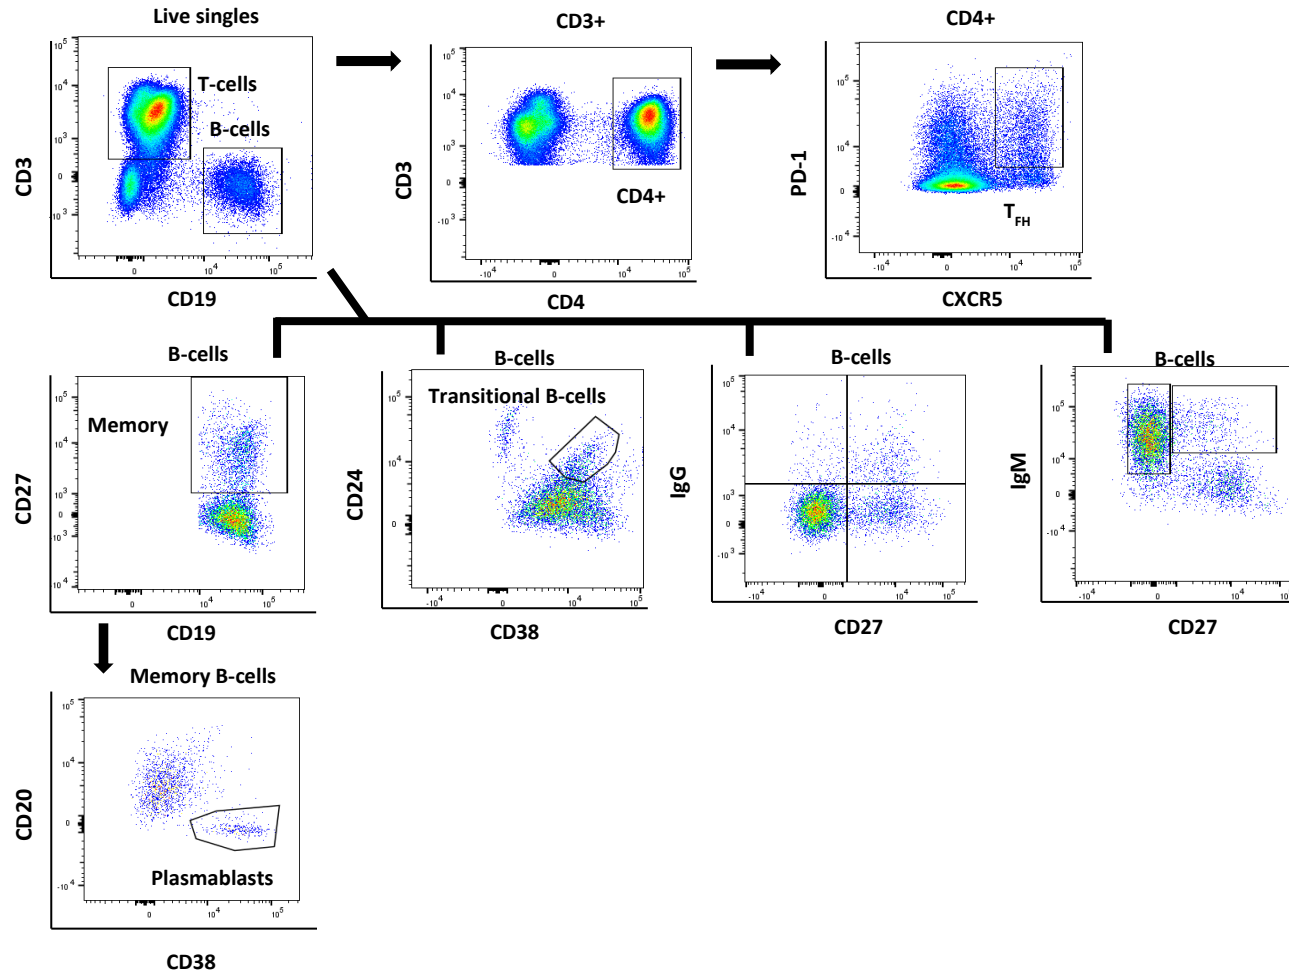

**eFigure 3. Gating Strategy for Innate Cell Populations** Granulocytes were selected within CD45<sup>+</sup> leukocytes based on their SSC profile and CD15 expression. Neutrophils were CD15<sup>+</sup>CD16<sup>+</sup> and eosinophils were CD15<sup>+</sup>CD16<sup>-</sup>. Within the non-granulocyte fraction, CD3 T cells were identified and B cells were identified based on CD19 and HLA-DR expression. CD11c<sup>+</sup>CD14<sup>+</sup> monocytes were gated within the non-T cell and non-B cell fraction. Total dendritic cells were HLADR<sup>+</sup>CD11c<sup>+</sup>CD14<sup>-</sup> and NK cells were HLADR<sup>-</sup>CD3<sup>-</sup>CD56<sup>+</sup> cells.

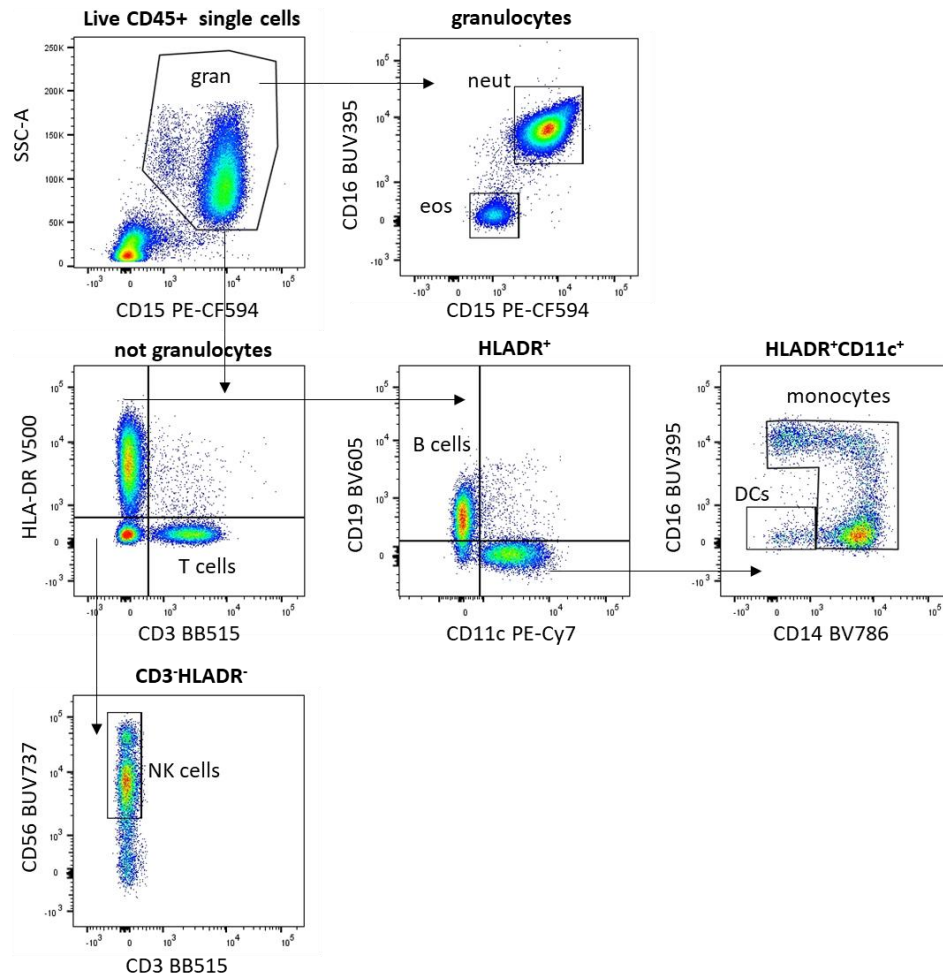

**eFigure 4. Correlation Analysis of 3 Serological Assays**

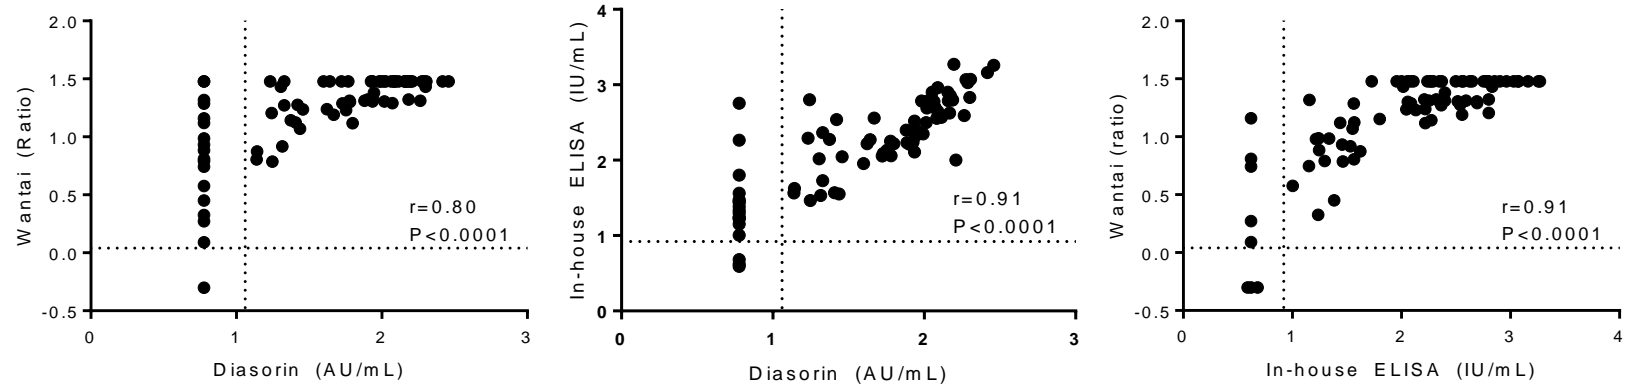

Antibody levels were log-transformed and analysed using Pearson correlation analyses. N=138-145.



**eFigure 5. Correlation Analysis of 3 Serological Assays Against SARS-CoV-2 Microneutralization Assay**

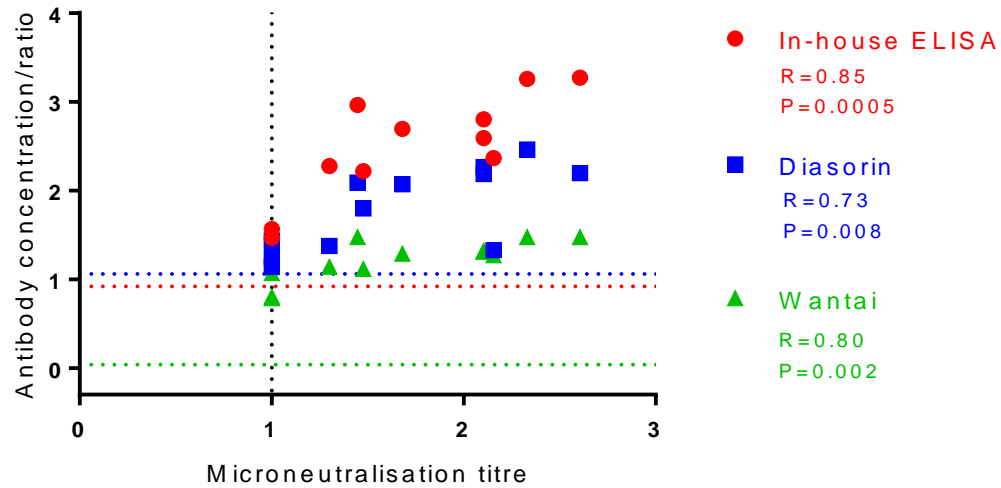

Antibody levels were log-transformed and analysed using Pearson correlation analyses. Coloured dotted line represents assay specific cut-off for seropositivity. N=12.

**eFigure 6. SARS-CoV-2 IgG Levels Over Time in Children and Adults Using an In-house ELISA**

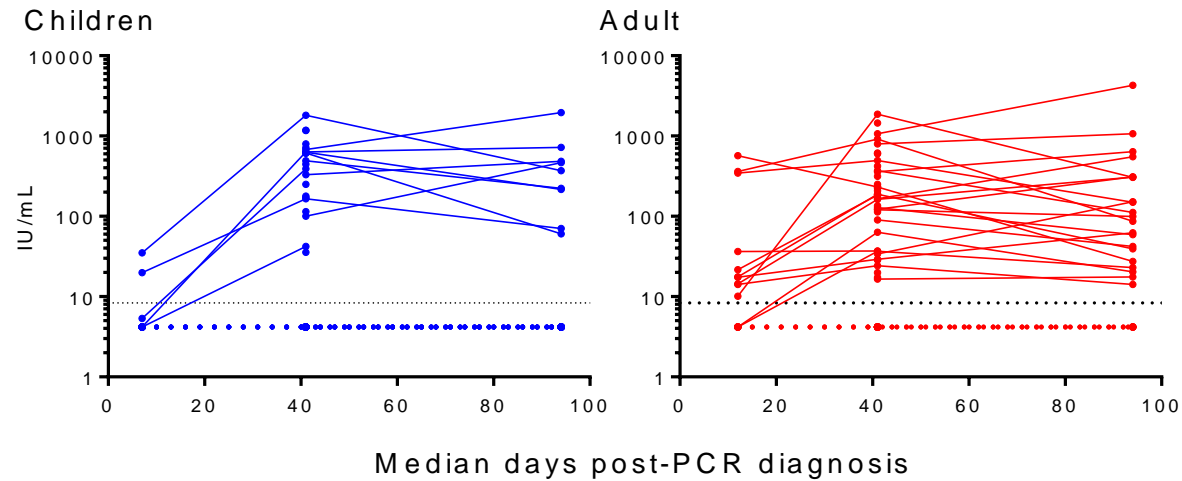

Number of samples per timepoint: Children, Day 7 (N=13), Day 41 (N=59), Day 94 (N=26); Adult, Day 12 (N=20), Day 41 (N=57), Day 94 (N=29).

**eFigure 7. Duration of Post-PCR Diagnosis and Viral Clearance, Sex, and Age Associated With SARS-CoV-2 Antibody Responses**

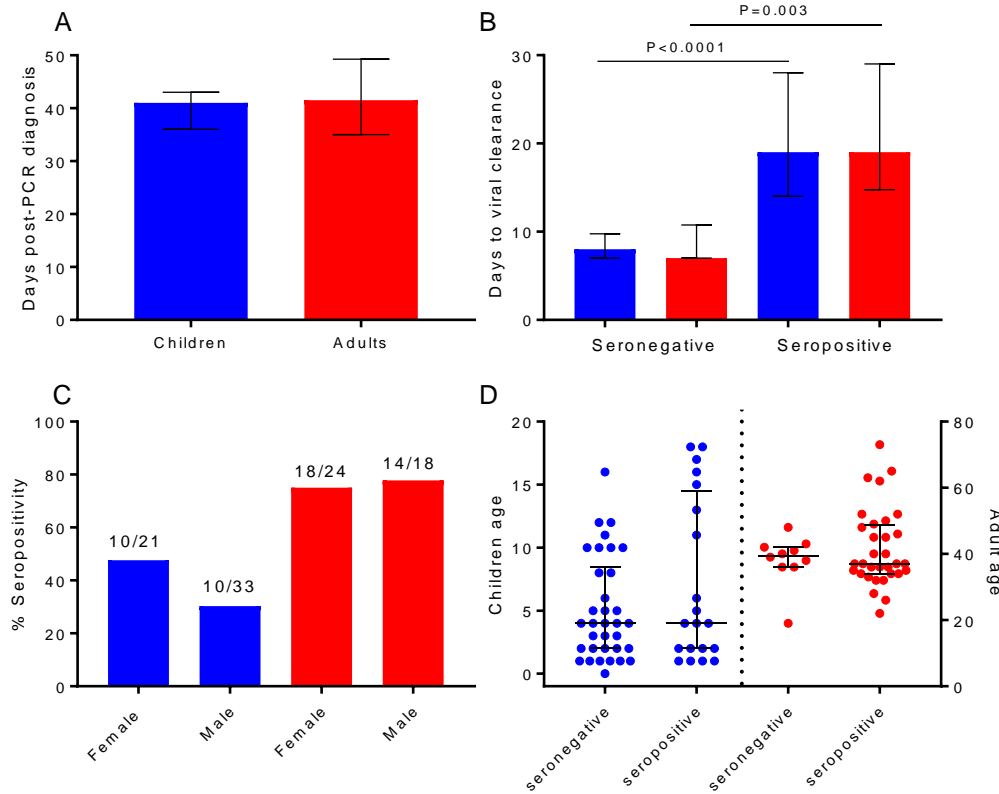

(A) Median days (IQR) between positive PCR diagnosis and convalescent blood sampling between children (N=54) and adult (N=42). (B) Duration of viral clearance (median days, IQR) stratified by serostatus (seronegative children, N=20, seropositive children, N=7; seronegative adult, N=4, seropositive adult, N=10). (C) Seropositivity rate stratified by sex. (D) Age of children and adults stratified by serostatus (Children, N=54; Adult, N=42) (Median, IQR).

## eFigure 8. Symptoms and Correlation Analysis Associated With SARS-CoV-2 Antibody Responses

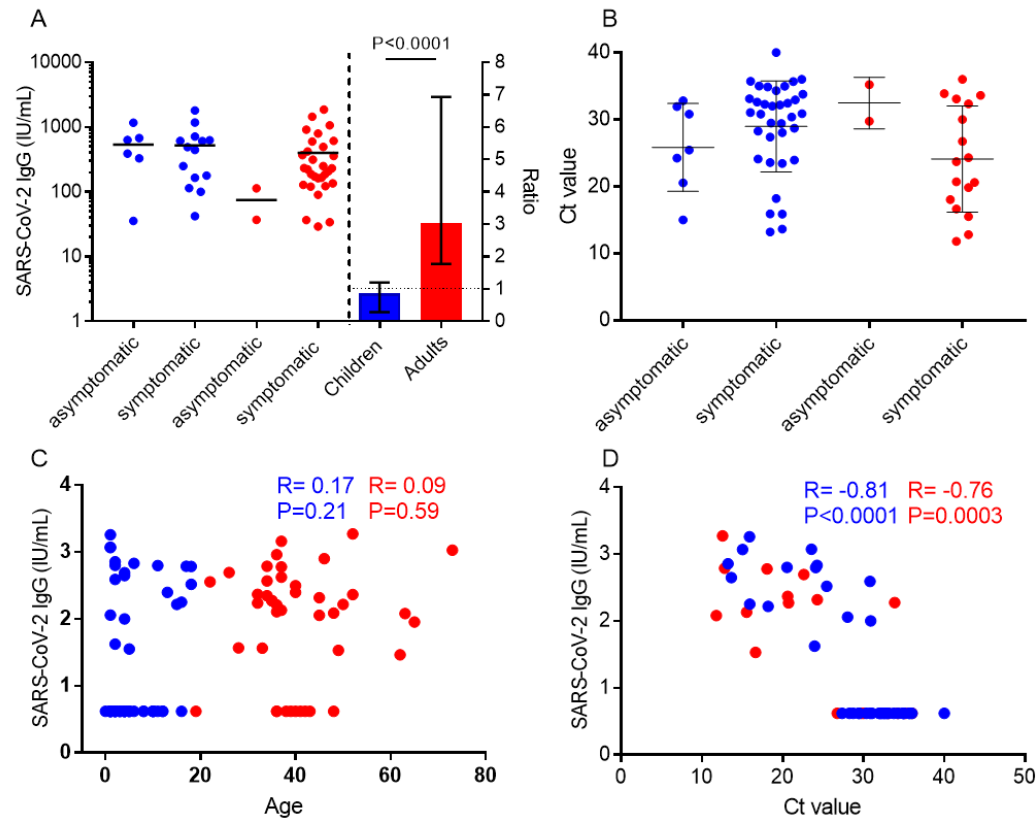

(A) Median antibody levels (IQR) based on symptoms (left y-axis) and median fold-change in antibody levels between asymptomatic and symptomatic in children (N=6 vs N=14) and adults (N=2 vs N=30) (right y-axis). (B) Mean viral load (SD) stratified based on symptoms in children (asymptomatic, N=7 vs symptomatic, N=35) and adults (asymptomatic, N=2 vs symptomatic, N=17). (C) Correlation between antibody levels and viral load. (D) Correlation between antibody levels and age. Blue dots/bars represent children and red dots/bars represent adults. Seropositivity was defined as seropositive by all three assays. Pearson's correlation analysis was used to examine association. Ct value: cycle threshold.

**eFigure 9. Humoral Immune Cells Profile During Convalescence Period in Children and Adults Following SARS-CoV-2 Infection**

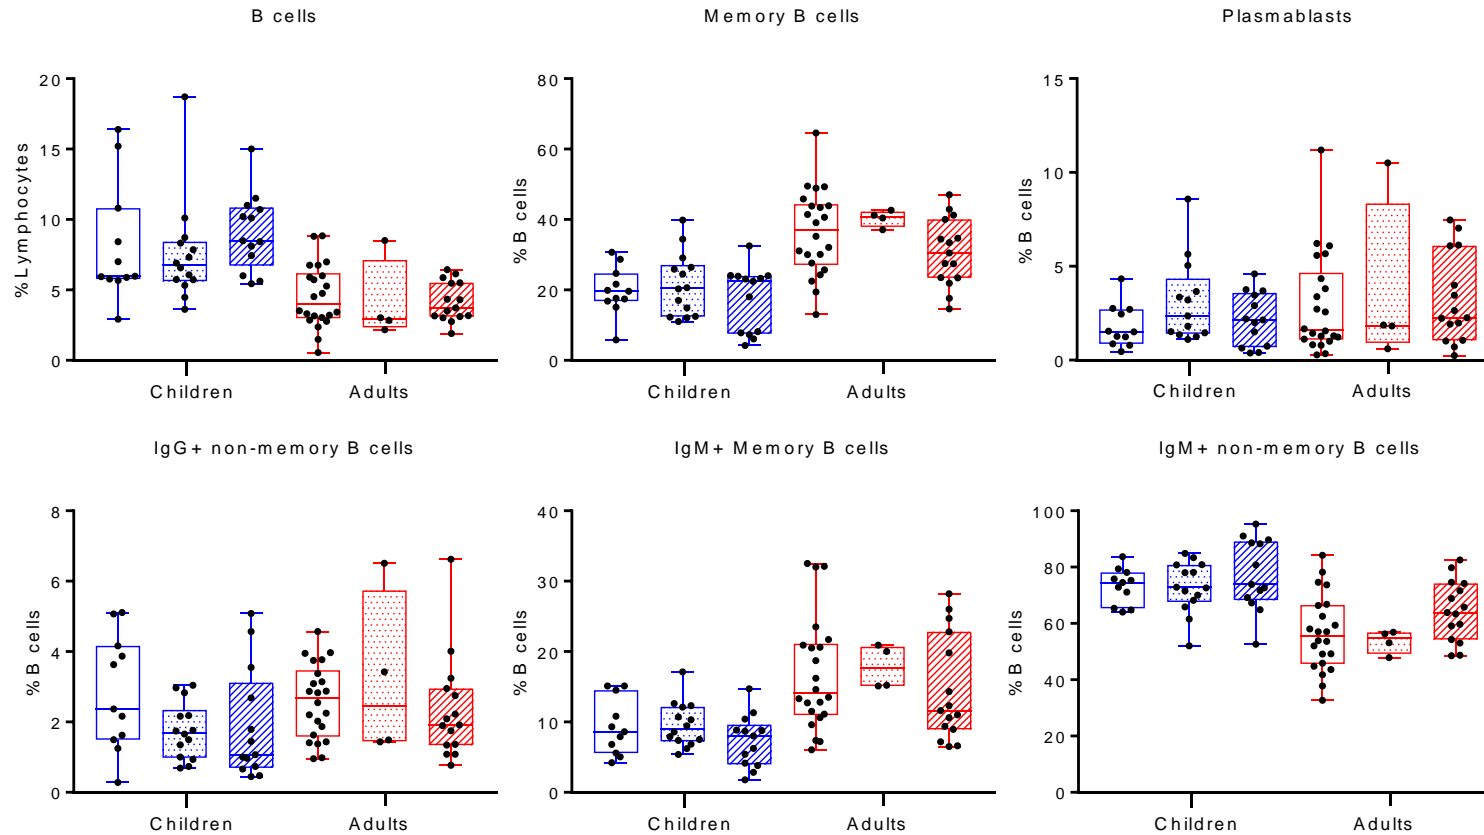

**Convalescence period (median day 41) in children (PCR+sero-, N=14; PCR+sero+, N=13) and adults (PCR+sero-, N=4, PCR+sero+, N=15) following SARS-CoV-2 infection. An uninfected control group was included for comparison (PCR-sero-: children, N=11; adults, N=22). Bars represent median and range.**

**eFigure 10. Cellular Immune Profile (T Cells) During Convalescence Period in Children and Adults Following SARS-CoV-2 Infection**

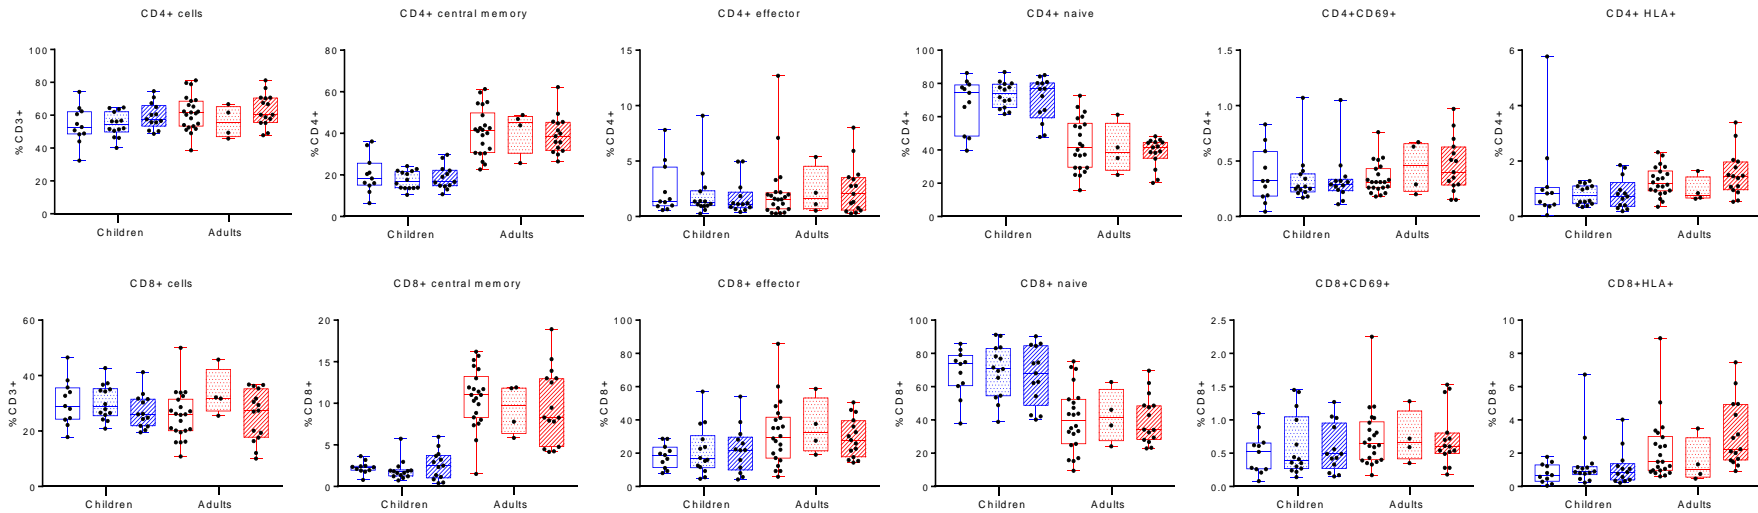

**Convalescence period (median day 41) in children (PCR+sero-, N=14; PCR+sero+, N=13) and adults (PCR+sero-, N=4, PCR+sero+, N=15) following SARS-CoV-2 infection. An uninfected control group was included for comparison (PCR-sero-: children, N=11; adults, N=22). Bars represent median and range.**

**eFigure 11. Innate Cell Profiles During Acute Phase for Children and Adults Following SARS-CoV-2 Infection**

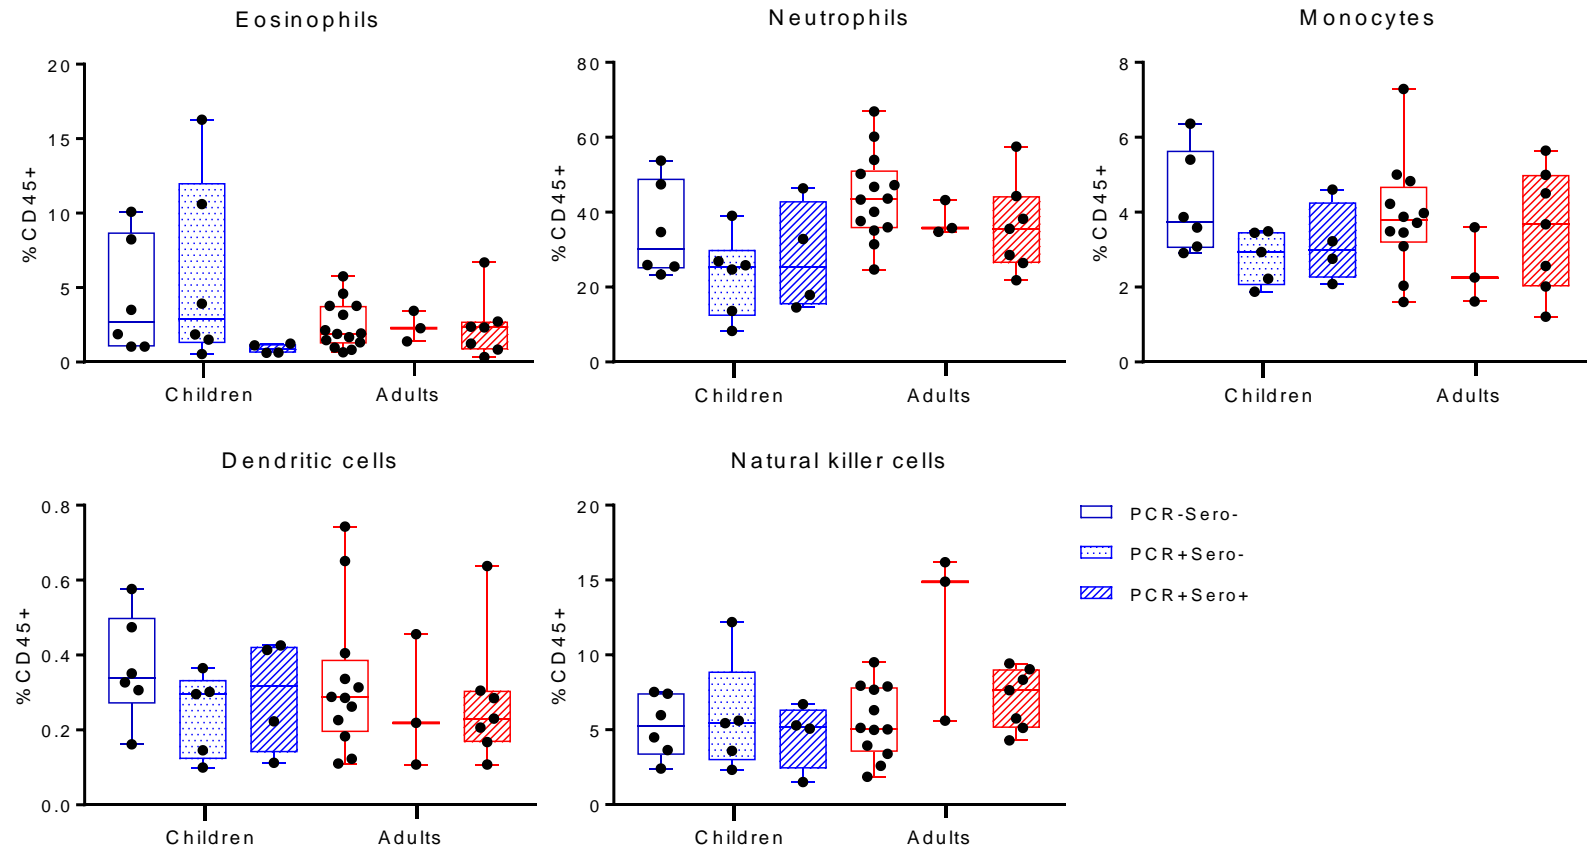

**Acute phase (day 7-12) for children (PCR+sero-, N=7; PCR+sero+, N=4) and adults (PCR+sero-, N=3, PCR+sero+, N=8) following SARS-CoV-2 infection.** An uninfected control group was included for comparison (PCR-sero-: children, N=6; adults, N=16). Bars represent median and range.
